# Supplementary material for: Metabolic Pathway Profiling in Intracellular and Extracellular Environments of Streptococcus thermophilus During pH-Controlled Batch Fermentations
Source: Front Microbiol. 2020 Jan 21;10:3144. doi: 10.3389/fmicb.2019.03144 (PMC6990133; doi:10.3389/fmicb.2019.03144)
Supplement: TABLE S2 — List of identified metabolites in ST-MZ-2 during culture based on LC-MS analysis. [file Table_2.XLS]

## Sheet: Sheet1
Table S2. List of identified metabolites in ST-MZ-2 during culture based on LC-MS analysis.
Feature	Putative Identification		Score	Fragmentation Score	Mass Error (ppm)	m/z	Retention time (min)
	Name	KEGG ID
0.62_342.1169n	Lactose	C00243	43	27.7	1.88602	365.106	0.619067
0.60_219.0270m/z	Galactose	C00124	39.6	13	2.5521	219.027	0.604767
11.72_205.0678m/z	Sorbitol	C00794	36.1	0	-2.63854	205.068	11.7219
0.68_527.1566m/z	Raffinose	C00492	30.6	6.28	-3.33234	527.157	0.6762
0.64_115.0026m/z	Fumaric acid	C00122	37.4	0	-9.14754	115.003	0.63605
0.68_215.0164m/z	Citric acid	C00158	38.2	0	0.77362	215.016	0.6762
7.00_297.0479m/z	5'-Phosphoribosyl-N-formylglycinamide	C04376	37.5	0	-1.04082	297.048	6.999
0.66_279.0397m/z	Uridine	C00299	37.7	22.4	3.1265	279.04	0.661983
0.68_211.0697m/z	Deoxyuridine	C00365	23.2	7.23	-7.26472	211.07	0.6762
1.12_323.0302m/z	UMP	C00105	36.4	0	5.01175	204.088	0.6762
0.68_322.0449m/z	CMP	C00055	36.3	8.96	0.968397	322.045	0.676283
0.68_321.0492m/z	dTMP	C00364	36.2	0	1.25	321.049	0.6762
0.55_256.0585m/z	N-Acetyl-D-glucosamine	C00140	29.2	0.604	-3.57025	256.059	0.547683
0.68_332.0766m/z	N-Acetylmuramate	C02713	31.1	2.01	7.97033	332.077	0.6762
0.68_204.0879m/z	N-Acetyl-D-mannosamine	C00645	33.3	6.65	5.82415	204.088	0.6762
0.71_565.0482m/z	UDP-glucose	C00029	32.8	2.07	1.77	565.048	0.711271
0.91_607.0835n	UDP-N-acetylglucosamine;	C00043	54.6	86.6	3.17198	608.091	0.911233
0.71_533.0604m/z	UDP-rhamnose	C02199	33.8	4.62	6.55926	533.06	0.711217
5.02_218.2120m/z	Dodecanoic acid	C02679	39	0	2.4771	218.212	5.01735
5.74_246.2429m/z	Tetradecanoic acid	C06424	43	17.4	0.656181	246.243	5.74457
5.27_143.1072m/z	Octanoic acid	C06423	42.1	5.65	4.19	143.107	5.271
6.31_296.2563m/z	Alpha-linolenic acid	C06427	37.9	1.54	-7.58767	296.256	6.31463
10.94_369.2198m/z	Docosapentaenoic acid	C16513	35.8	2.15	2.2566	369.22	10.9357
8.56_329.2466m/z	Eicosatrienoic acid	C16522	28.2	0	4.73464	329.247	8.56182
7.18_305.2462m/z	Arachidonic acid	C00219	36.5	0	-4.21662	305.246	7.18477
11.07_265.2540m/z	Octadecenoic acid	C08367	42.2	30.4	5.13152	265.254	11.0684
7.42_281.2469m/z	Linoleate	C01595	40.1	12.2	-2.29442	281.247	7.42433
7.77_348.2886m/z	Eicosapentaenoic acid	C13364	38.5	0	-3.30683	348.289	7.77357
7.95_308.2723n	Eicosadienoic acid	C16525	34.8	1.29	2.60684	331.224	7.9454
7.08_354.3372m/z	Docosadienoic acid	C16533	44.7	29.1	1.5924	354.337	7.08473
0.59_155.0697n	Histidine	C00768	41.1	11.2	1.40341	178.059	0.590483
3.61_138.0535m/z	Proline	C00148	33.4	0	-2.81472	138.054	0.171433
0.63_118.0867m/z	Valine	C00183	53.3	70.9	3.38398	118.087	0.63335
4.95_164.0704m/z	Phenylalanine	C00079	36.8	0	-7.88645	164.07	4.95107
3.72_227.0806m/z	Tryptophan	C00078	48.9	56.4	7.4989	227.081	3.72007
1.98_180.0655m/z	Tyrosine	C00082	51.2	63.5	-6.01408	180.065	1.97868
0.61_74.0248m/z	Glycine	C00037	36.9	0.0671	8.11	74.0248	0.619067
0.71_132.1024m/z	Leucine	C00123	38.5	0	3.71377	132.102	0.711217
0.63_118.0867m/z	Betaine	C00719	53.2	70.7	3.4	118.087	0.63335
14.86_181.0867m/z	Selenocysteine	C05688	53.2	70.7	3.38398	118.087	14.8561
4.62_198.0046m/z	Selenomethionine	C05335	20	0	-0.295485	198.005	4.62517
0.71_164.0474n	Phenylpyruvate	C00166	42.7	19.9	0.0552189	182.081	0.711217
3.62_184.0969m/z	Phenyllacetate	C07086	39.2	0	0.721487	184.097	3.62007
7.31_163.0388m/z	4-Hydroxyphenylpyruvate	C01179	53.7	71.4	-0.699433	163.039	7.30588
0.71_198.0772m/z	L-Dopa	C00355	29.4	11.1	3.03	198.077	0.711217
3.72_118.0657m/z	Indole	C00463	42	19.4	4.76048	118.066	3.72007
